# Supplementary material for: Quantitative earthquake-like statistical properties of the flow of soft materials below yield stress
Source: Springer Nature journal article supplement (doi:10.1038/s41467-019-13790-2), 2020-01-07
Supplement: MOESM3 [file 41467_2019_13790_MOESM3_ESM.pdf]

## Description of Additional Supplementary Files

### **Supplementary Movie1:**

100 fps Movie; constructed using POM images obtained during the rheo-POM measurement of 39 wt% CTAT + Water at 30° C with  $d = 150 \mu\text{m}$  and  $\sigma = 2 \text{ Pa}$  (Left panel). Right panel is the corresponding binary version for better visibility.

### **Supplementary Movie2:**

100 fps Movie; with no shear condition.
